# Supplementary material for: AURKB: a promising biomarker in clear cell renal cell carcinoma
Source: PeerJ. 2019 Sep 16;7:e7718. doi: 10.7717/peerj.7718 (PMC6752188; doi:10.7717/peerj.7718)
Supplement: File S4 [file peerj-07-7718-s004.xls]

## Sheet: Sheet1
Cell line	TCGA classification	Tissue	Tissue sub-type	IC50	AUC
LB1047-RCC	KIRC	kidney	kidney	3.28	0.897
RCC-JF	KIRC	kidney	kidney	3.8	0.907
BB65-RCC	KIRC	kidney	kidney	4.16	0.909
A704	KIRC	kidney	kidney	4.56	0.939
RXF393	KIRC	kidney	kidney	4.7	0.892
VMRC-RCW	KIRC	kidney	kidney	5.73	0.957
NCC021	KIRC	kidney	kidney	5.74	0.926
RCC-MF	KIRC	kidney	kidney	5.85	0.914
RCC-JW	KIRC	kidney	kidney	6.07	0.945
RCC-FG2	KIRC	kidney	kidney	6.48	0.921
VMRC-RCZ	KIRC	kidney	kidney	7.87	0.941
RCC-ER	KIRC	kidney	kidney	8.84	0.95
HA7-RCC	KIRC	kidney	kidney	9.03	0.953
NCC010	KIRC	kidney	kidney	9.06	0.956
OS-RC-2	KIRC	kidney	kidney	9.26	0.923
KMRC-1	KIRC	kidney	kidney	9.4	0.959
LB2241-RCC	KIRC	kidney	kidney	9.75	0.954
ACHN	KIRC	kidney	kidney	13	0.962
KMRC-20	KIRC	kidney	kidney	16.4	0.978
CAKI-1	KIRC	kidney	kidney	19.2	0.948
A498	KIRC	kidney	kidney	20.8	0.949
RCC-AB	KIRC	kidney	kidney	35.2	0.974
TK10	KIRC	kidney	kidney	44.1	0.983
RCC10RGB	KIRC	kidney	kidney	110	0.963
